# Supplementary material for: Glucagon-Like Peptide-1 Receptor Agonists for Treatment of Nonalcoholic Fatty Liver Disease and Nonalcoholic Steatohepatitis: An Updated Meta-Analysis of Randomized Controlled Trials
Source: Metabolites. 2021 Jan 27;11(2):73. doi: 10.3390/metabo11020073 (PMC7911747; doi:10.3390/metabo11020073)
Supplement: Supplementary file 1 [file metabolites-11-00073-s001.pdf]

## Online-Only Supplementary Material

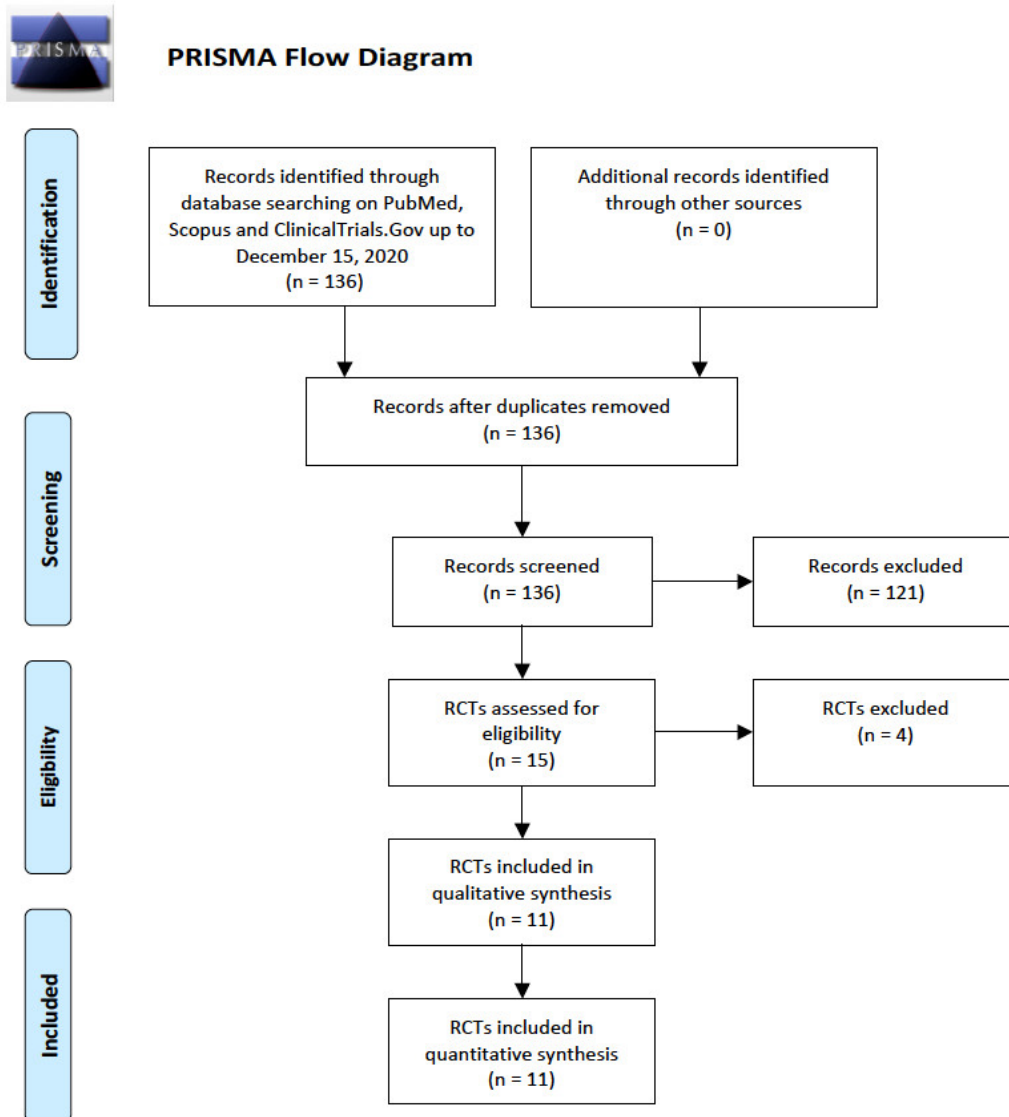

From: Moher D, Liberati A, Tetzlaff J, Altman DG, The PRISMA Group (2009). Preferred Reporting Items for Systematic Reviews and Meta-Analyses: The PRISMA Statement. PLoS Med 6(6): e1000097. doi:10.1371/journal.pmed1000097

For more information, visit [www.prisma-statement.org](http://www.prisma-statement.org).

**Figure S1.** The PRISMA flow diagram for search and selection processes of the meta-analysis.

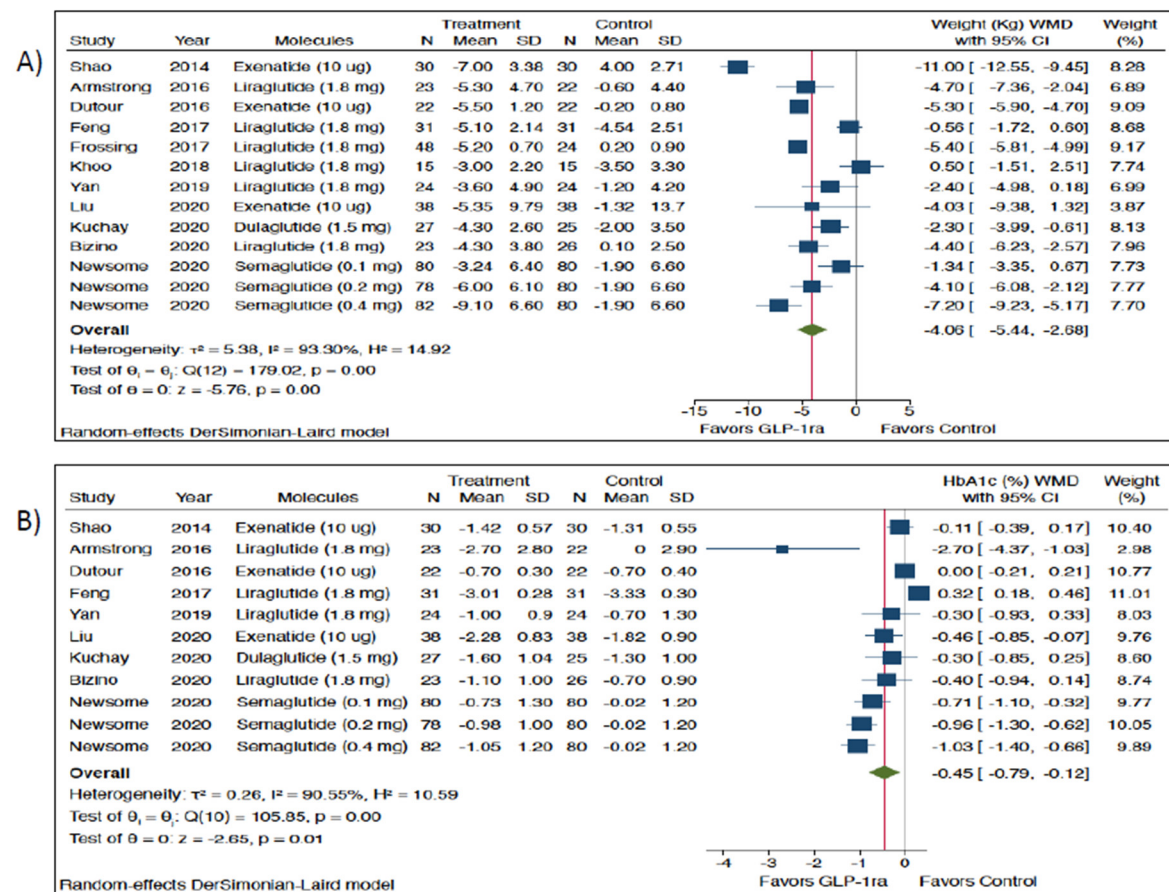

**Figure S2.** Forest plot of the effects of different GLP-1 RAs on body weight (panel **A**) and hemoglobin A1c levels (panel **B**) as compared with placebo or reference therapy. The effect size was expressed as weighted mean difference (WMD) and 95% confidence intervals for all RCTs included.

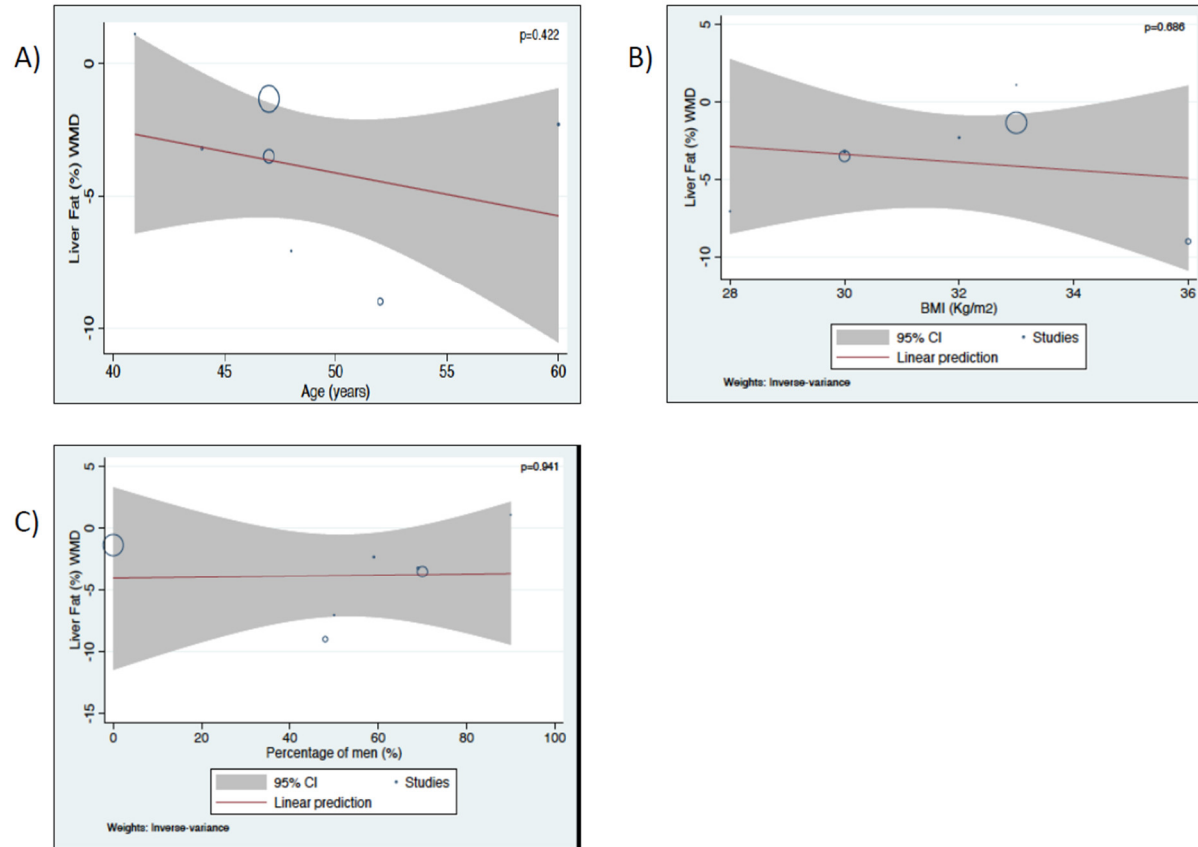

**Figure S3:** Univariable meta-regression analyses. A meta-analysis of the association of age (panel **A**), body mass index (panel **B**), and percentage of male sex (panel **C**) with weighted mean difference (WMD) of liver fat content (for RCTs using magnetic resonance-based techniques).

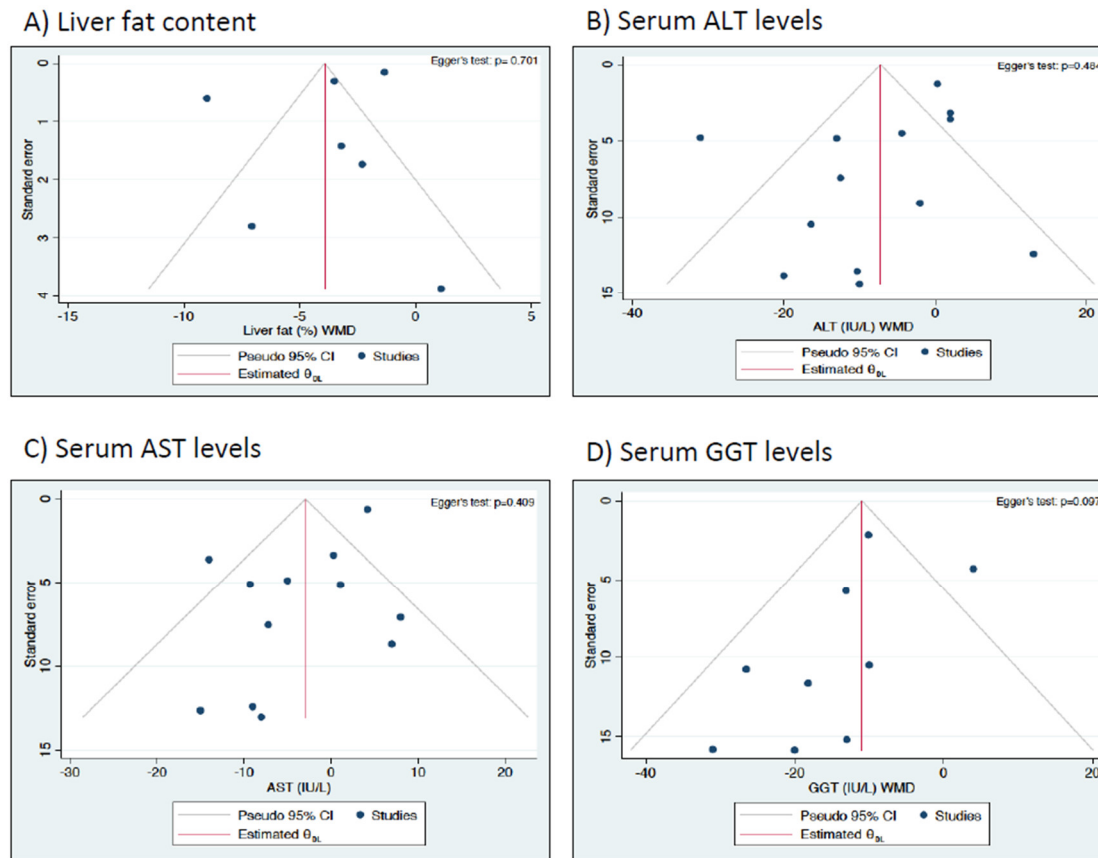

**Figure S4:** Funnel plots of standard errors by weighted mean difference (WMD) in liver fat content as assessed by MRI-PDFF or MRS (panel A), serum ALT (panel B) serum AST (panel C) and serum GGT (panel D) levels. P-values were assessed by the Egger's regression test.

**Table S1.** Placebo-controlled or active-controlled RCTs of different GLP-1 RAs for treatment of NAFLD or NASH ( $n = 11$  studies ordered by publication year).

| Author, Year, Country (PMID)                                  | RCT's characteristics                                                                                                                                                                                      | Interventions (n), RCT's length                                                                                                  | Efficacy and/or effectiveness outcomes A vs. B (or vs. C or D)                                                                                                                                                                                                                                                                                                                                                                                                           | Major adverse effects                                                           |
|---------------------------------------------------------------|------------------------------------------------------------------------------------------------------------------------------------------------------------------------------------------------------------|----------------------------------------------------------------------------------------------------------------------------------|--------------------------------------------------------------------------------------------------------------------------------------------------------------------------------------------------------------------------------------------------------------------------------------------------------------------------------------------------------------------------------------------------------------------------------------------------------------------------|---------------------------------------------------------------------------------|
| Shao <i>et al.</i> 2014; China (PMID: 24823873)               | Patients with T2DM and NAFLD on liver ultrasound (with raised serum liver enzyme levels)<br>Mean age: 43 years; male sex: 48%; BMI 30 kg/m <sup>2</sup> ; HbA1c 7.6%; ALT 166 IU/L; AST 123 IU/L           | A. Exenatide + glargine ( $n = 30$ )<br>B. Intensive insulin: Insulin aspart + insulin glargine ( $n = 30$ )<br>Length: 12 weeks | Reversal rate of NAFLD based on ultrasound (A vs. B): 93% vs. 67%, $p < 0.01$<br>Differences in body weight change post-treatment <i>minus</i> pre-treatment: -7.8 vs. 3.3 kg, $p < 0.001$<br>No difference in HbA1c changes between groups                                                                                                                                                                                                                              | Not reported                                                                    |
| Armstrong <i>et al.</i> 2016; United Kingdom (PMID: 26608256) | Patients with NASH (i.e., LEAN trial) on liver biopsy<br>Mean age: 51 years; male sex: 60%; BMI 36 kg/m <sup>2</sup> ; ALT 71 IU/L; AST 51 IU/L; fibrosis F3-F4 (on histology) 52%; pre-existing T2DM: 33% | A. Liraglutide 1.8 mg/day ( $n = 26$ )<br>B. Placebo ( $n = 26$ )<br>Length: 48 weeks                                            | Histologic resolution of NASH: 39% vs. 9%, $p = 0.019$<br>Change in histologic NAS score: -1.3 vs. -0.8, $p = 0.24$<br>Change in fibrosis stage: -0.2 vs. 0.2, $p = 0.11$<br>Fibrosis improvement: 26% vs. 14%, $p = 0.46$<br>Fibrosis worsening: 9% vs. 36%, $p = 0.04$<br>Change in ALT: -26.6 vs. -10.2 UI/L, $p = 0.16$<br>Change in AST: -27 vs. +9 IU/L; $p = 0.02$                                                                                                | Moderate gastrointestinal disorders in the liraglutide vs. placebo: 81% vs. 65% |
| Dutour <i>et al.</i> 2016; France (PMID: 27106272)            | Patients with T2DM, 95% of whom had NAFLD on MRS<br>Mean age: 52 years; male sex: 48%; BMI 36 kg/m <sup>2</sup> ; HbA1c 7.5%; ALT 29 IU/L; AST 22 IU/L                                                     | A: Exenatide 5-10 mcg bid ( $n = 22$ )<br>B: Placebo ( $n = 22$ )<br>Length: 26 weeks                                            | Exenatide and reference treatment led to a similar improvement in HbA1c ( $-0.7 \pm 0.3\%$ vs. $-0.7 \pm 0.4\%$ ; $p = 0.29$ )<br>Significant weight loss was observed in the exenatide group ( $-5.5 \pm 1.2$ kg vs. $-0.2 \pm 0.8$ kg; $p = 0.001$ for difference between groups)<br>Exenatide induced a significant reduction in liver fat content, compared with the reference treatment (liver fat content: $-23.8 \pm 9.5\%$ vs. $+12.5 \pm 9.6\%$ , $p = 0.007$ ) | Not reported                                                                    |

|                                                             |                                                                                                                                                               |                                                                                                                                                                            |                                                                                                                                                                                                                                                                                                                                                                                                                                                                                                                                                                                                                                                                                                                                                                                                                                                                                                                                                                                                                                                                                                   |                                                        |
|-------------------------------------------------------------|---------------------------------------------------------------------------------------------------------------------------------------------------------------|----------------------------------------------------------------------------------------------------------------------------------------------------------------------------|---------------------------------------------------------------------------------------------------------------------------------------------------------------------------------------------------------------------------------------------------------------------------------------------------------------------------------------------------------------------------------------------------------------------------------------------------------------------------------------------------------------------------------------------------------------------------------------------------------------------------------------------------------------------------------------------------------------------------------------------------------------------------------------------------------------------------------------------------------------------------------------------------------------------------------------------------------------------------------------------------------------------------------------------------------------------------------------------------|--------------------------------------------------------|
| Feng <i>et al.</i> 2017; China<br>(PMID: 28332301)          | Patients with T2DM and<br>NAFLD on ultrasound<br>Mean age: 47 years; male sex:<br>75%; BMI 28 kg/m <sup>2</sup> ; HbA1c<br>9.1%; ALT 49 IU/mL; AST 31<br>IU/L | A. Liraglutide up to<br>1.8 mg/d ( <i>n</i> = 31)<br>B. Metformin up to<br>2000 mg/d ( <i>n</i> = 31)<br>C. Gliclazide 60-120<br>mg/d ( <i>n</i> = 31)<br>Length: 24 weeks | Liver fat content (estimated by ultrasound) decreased in<br>all treatment groups, from 36.7 ± 3.6% to 13.1 ± 1.8% in<br>the liraglutide group, from 33.0 ± 3.5% to 19.6 ± 2.1% in<br>the gliclazide group, and from 35.1 ± 2.3% to 18.4 ± 2.2%<br>in the metformin group ( <i>p</i> < 0.001 for all treatment<br>groups, final vs. baseline)<br>Reduction in liver fat content following liraglutide<br>treatment was greater than that following gliclazide<br>treatment ( <i>p</i> = 0.001)<br>Both liraglutide and metformin treatments reduced<br>weight and improved liver function tests<br>HbA1c levels were lower in the liraglutide- and<br>metformin-treated groups than in the gliclazide-treated<br>group                                                                                                                                                                                                                                                                                                                                                                             | Not reported                                           |
| Frossing <i>et al.</i> 2018;<br>Denmark (PMID:<br>28681988) | Non-diabetic women with<br>polycystic ovary syndrome<br>and NAFLD on MRS<br>Mean age: 47 years; female<br>sex: 100%; BMI 33 kg/m <sup>2</sup>                 | A. Liraglutide 1.8<br>mg/d ( <i>n</i> = 48)<br>B. Placebo ( <i>n</i> = 24)<br>Length: 26 weeks                                                                             | Liraglutide treatment reduced body weight by 5.2 kg (-<br>5.6% from baseline), liver fat content (on MR<br>spectroscopy) by 44% and the prevalence of NAFLD by<br>about two-thirds (all <i>p</i> < 0.01)<br>Liraglutide treatment caused significant reductions in<br>fasting plasma glucose (liraglutide vs placebo, mean<br>between-group difference [95% CI], -0.24 [-0.44 to -0.04]<br>mmol/L; mean HbA1c [95% CI], -1.38 [-2.48 to -0.28]<br>mmol/mol)<br>In the liraglutide and sitagliptin groups, liver fat content,<br>significantly decreased from baseline to week 26<br>(liraglutide, 15.4 ± 5.6% to 12.5 ± 6.4%, <i>p</i> < 0.001; and<br>sitagliptin, 15.5 ± 5.6% to 11.7 ± 5.0%, <i>p</i> = 0.001)<br>HbA1c levels decreased in all treatment groups<br>(liraglutide, 7.8 ± 1.4% to 6.8 ± 1.7%, <i>p</i> < 0.001; sitagliptin,<br>7.6 ± 0.9% to 6.6 ± 1.1%, <i>p</i> = 0.016; and insulin glargine,<br>7.7 ± 0.9% to 6.9% ± 1.1%, <i>p</i> = 0.013)<br>Body weight significantly decreased in the liraglutide<br>and sitagliptin groups (but not in the insulin glargine<br>group) | Nausea and<br>constipation in the<br>liraglutide group |
| Yan <i>et al.</i> 2019; China<br>(PMID: 30341767)           | Patients with T2DM and<br>NAFLD on MRI-PDFP<br>Mean age: 44 years; male sex:<br>69%; BMI 29.8 kg/m <sup>2</sup> ; HbA1c<br>7.7%; ALT 43 IU/L; AST 33<br>IU/L  | A. Liraglutide 1.8<br>mg/d ( <i>n</i> = 24)<br>B. Insulin glargine<br>0.2 IU/kg/d ( <i>n</i> = 24)<br>C. Sitagliptin 100<br>mg/d ( <i>n</i> = 27)<br>Length: 26 weeks      |                                                                                                                                                                                                                                                                                                                                                                                                                                                                                                                                                                                                                                                                                                                                                                                                                                                                                                                                                                                                                                                                                                   | Not reported                                           |

|                                                               |                                                                                                                                                                 |                                                                                                                                         |                                                                                                                                                                                                                                                                                                                                                                                                                                                                                                                                                                                                                                                        |                                                                              |
|---------------------------------------------------------------|-----------------------------------------------------------------------------------------------------------------------------------------------------------------|-----------------------------------------------------------------------------------------------------------------------------------------|--------------------------------------------------------------------------------------------------------------------------------------------------------------------------------------------------------------------------------------------------------------------------------------------------------------------------------------------------------------------------------------------------------------------------------------------------------------------------------------------------------------------------------------------------------------------------------------------------------------------------------------------------------|------------------------------------------------------------------------------|
| Khoo <i>et al.</i> 2019;<br>Singapore (PMID:<br>30721572)     | Non-diabetic patients with<br>obesity and NAFLD on MRI-<br>PDFF<br>Mean age: 41 years; male sex:<br>90%; BMI 33 kg/m <sup>2</sup> ; ALT 88<br>IU/L; AST 48 IU/L | A. Liraglutide 3.0<br>mg/d ( <i>n</i> = 15)<br>B. Lifestyle<br>modifications<br>(diet+exercise) ( <i>n</i> =<br>15)<br>Length: 26 weeks | The two treatment groups had significant ( <i>p</i> < 0 .01) and<br>similar reductions in liver fat content (−8.1 ± 13.2 vs. −7.0<br>± 7.1%), serum ALT (−39 ± 35 vs. −26 ± 33 U/L) and body<br>weight at 26 weeks                                                                                                                                                                                                                                                                                                                                                                                                                                     | Nausea, abdominal<br>discomfort and<br>diarrhoea in the<br>liraglutide group |
| Liu <i>et al.</i> 2020; China<br>(PMID: 31955491)             | Patients with T2DM and<br>NAFLD on MRI-PDFF<br>Mean age: 48 years; male sex:<br>50%; BMI 28 kg/m <sup>2</sup> ; HbA1c<br>8.3%; ALT 38 IU/L; AST 28<br>IU/L      | A. Exenatide 1.8<br>mg/d ( <i>n</i> = 38)<br>B. Insulin glargine<br>0.2 IU/kg/d ( <i>n</i> = 38)<br>Length: 24 weeks                    | Liver fat content was significantly reduced after<br>exenatide treatment (Δ liver fat −17.6 ± 12.9%). Exenatide<br>treatment resulted in greater reductions in visceral<br>adipose tissue decreased in the exenatide group<br>compared to control group (ΔVAT −43.6 ± 68.2 cm <sup>2</sup> ),<br>serum ALT, AST, GGT levels, BMI and waist<br>circumference than control group                                                                                                                                                                                                                                                                         | Proportion of adverse<br>events were<br>comparable between<br>the two groups |
| Bizino <i>et al.</i> 2020;<br>Netherlands (PMID:<br>31690988) | Patients with T2DM and<br>NAFLD on MRS<br>Mean age: 60 years; male sex:<br>59%; BMI 32 kg/m <sup>2</sup> ; HbA1c<br>8.3%; ALT 14 IU/L; AST 33<br>IU/L           | A. Liraglutide 1.8<br>mg/d ( <i>n</i> = 23)<br>B. Placebo ( <i>n</i> = 26)<br>Length: 26 weeks                                          | Liver fat content was not different between groups<br>(liraglutide 18.1 ± 11.2% to 12.0 ± 7.7%; placebo 18.4 ±<br>9.4% to 14.7 ± 10.0%; estimated treatment effect −2.1 [95%<br>CI −5.3, 1.0]%)<br>Liraglutide vs. placebo significantly reduced body<br>weight (liraglutide 98.4 ± 13.8 kg to 94.3 ± 14.9 kg;<br>placebo 94.5 ± 13.1 kg to 93.9 ± 3.2 kg; estimated<br>treatment effect −4.5 [95% CI −6.4, −2.6] kg)<br>Serum liver enzymes and HbA1c levels declined in both<br>groups without a significant treatment effect of<br>liraglutide vs. placebo (liraglutide HbA1c 8.4 ± 1.1% to<br>7.3 ± 1.2%]; placebo HbA1c 8.2 ± 1.0% to 7.5 ± 0.7%] | There were no serious<br>drug-related adverse<br>events                      |

|                                                      |                                                                                                                                                                               |                                                                                                                                                            |                                                                                                                                                                                                                                                                                                                                                                                                                                                                                                                                                                                                                                                                                                                                                                                                                                                                                                                                                                                                                                                                                                                                                                                                                                                           |                                                                                                                                                              |
|------------------------------------------------------|-------------------------------------------------------------------------------------------------------------------------------------------------------------------------------|------------------------------------------------------------------------------------------------------------------------------------------------------------|-----------------------------------------------------------------------------------------------------------------------------------------------------------------------------------------------------------------------------------------------------------------------------------------------------------------------------------------------------------------------------------------------------------------------------------------------------------------------------------------------------------------------------------------------------------------------------------------------------------------------------------------------------------------------------------------------------------------------------------------------------------------------------------------------------------------------------------------------------------------------------------------------------------------------------------------------------------------------------------------------------------------------------------------------------------------------------------------------------------------------------------------------------------------------------------------------------------------------------------------------------------|--------------------------------------------------------------------------------------------------------------------------------------------------------------|
| Kuchay <i>et al.</i> 2020;<br>India (PMID: 32865597) | <p>Patients with T2DM and NAFLD on MRI-PDFF (i.e. D-LIFT trial)</p> <p>Mean age: 47 years; male sex: 70%; BMI 29.7 kg/m<sup>2</sup>; HbA1c 8.4%; ALT 69 IU/L; AST 47 IU/L</p> | <p>A. Dulaglutide 1.5 mg/week (<i>n</i> = 32)</p> <p>B. Placebo (<i>n</i> = 32)</p> <p>Length: 24 weeks</p> <p>Open-label trial (add-on to usual care)</p> | <p>Dulaglutide treatment resulted in a control-corrected absolute change in liver fat content of -3.5% (95% CI -6.6, -0.4; <i>p</i> = 0.025) and relative change of -26.4% (-44.2, -8.6; <i>p</i> = 0.004)</p> <p>Dulaglutide-treated participants showed a significant reduction in serum GGT levels (mean between-group difference -13.1 U/l [95% CI -24.4, -1.8]; <i>p</i> = 0.025) and non-significant reductions in AST and ALT levels</p> <p>Absolute changes in liver stiffness on Fibroscan (-1.31 kPa [-2.99, 0.37]; <i>p</i> = 0.12) were not significant when comparing the two groups.</p> <p>Percentage of patients in whom NASH resolution was achieved with no worsening of fibrosis was 40% in the 0.1-mg group, 36% in the 0.2-mg group, 59% in the 0.4-mg group, and 17% in the placebo group (<i>p</i> &lt; 0.001 for semaglutide 0.4 mg vs. placebo)</p> <p>Improvement in fibrosis stage occurred in 43% of the patients in the 0.4-mg group and in 33% of the patients in the placebo group (<i>p</i> = 0.48)</p> <p>Treatment with semaglutide resulted in dose-dependent reductions of serum ALT and AST levels</p> <p>Mean percent weight loss was 13% in the 0.4-mg group and 1% in the placebo group (<i>p</i> &lt; 0.001)</p> | <p>There were no serious drug-related adverse events</p> <p>Nausea, constipation, and vomiting were higher in the 0.4-mg group than in the placebo group</p> |
|------------------------------------------------------|-------------------------------------------------------------------------------------------------------------------------------------------------------------------------------|------------------------------------------------------------------------------------------------------------------------------------------------------------|-----------------------------------------------------------------------------------------------------------------------------------------------------------------------------------------------------------------------------------------------------------------------------------------------------------------------------------------------------------------------------------------------------------------------------------------------------------------------------------------------------------------------------------------------------------------------------------------------------------------------------------------------------------------------------------------------------------------------------------------------------------------------------------------------------------------------------------------------------------------------------------------------------------------------------------------------------------------------------------------------------------------------------------------------------------------------------------------------------------------------------------------------------------------------------------------------------------------------------------------------------------|--------------------------------------------------------------------------------------------------------------------------------------------------------------|

Abbreviations: ALT, alanine aminotransferase; AST, aspartate aminotransferase; BMI, body mass index; GGT, gamma-glutamyltransferase; MRS, magnetic resonance spectroscopy; MRI-PDFF, magnetic resonance imaging-proton density fat fraction; NAFLD, nonalcoholic fatty liver disease; NASH, nonalcoholic steatohepatitis; T2DM, type 2 diabetes mellitus.

**Table S2.** Risk of bias for each RCT assessed by the Cochrane Collaboration's tool.

| Author(s)        | Year | Random Sequence Generation (Selection Bias) | Allocation Concealment (Selection Bias) | Blinding of Participants and Personnel (Performance Bias) | Blinding of Outcome Assessment (Detection Bias) | Incomplete Outcome Data (Attrition Bias) | Selective Reporting (Reporting Bias) | Other Bias * |
|------------------|------|---------------------------------------------|-----------------------------------------|-----------------------------------------------------------|-------------------------------------------------|------------------------------------------|--------------------------------------|--------------|
| Shao et al.      | 2014 | Low                                         | Low                                     | Unclear                                                   | Unclear                                         | Unclear                                  | Unclear                              | High         |
| Armstrong et al. | 2016 | Low                                         | Low                                     | Low                                                       | Low                                             | Low                                      | Low                                  | Low          |
| Dutour et al.    | 2016 | Low                                         | Low                                     | Low                                                       | Low                                             | Unclear                                  | Unclear                              | Unclear      |
| Feng et al.      | 2017 | Low                                         | Unclear                                 | Low                                                       | Low                                             | Low                                      | Unclear                              | High         |
| Frossing et al.  | 2018 | Low                                         | Low                                     | Low                                                       | Low                                             | Unclear                                  | Unclear                              | Unclear      |
| Yan et al.       | 2019 | Low                                         | Low                                     | Unclear                                                   | Low                                             | Unclear                                  | Unclear                              | Unclear      |
| Khoo et al.      | 2019 | Low                                         | Low                                     | Unclear                                                   | Low                                             | Low                                      | Unclear                              | Unclear      |
| Liu et al.       | 2020 | Low                                         | Low                                     | Unclear                                                   | Low                                             | Unclear                                  | Unclear                              | Unclear      |
| Bizino et al.    | 2020 | Low                                         | Low                                     | Low                                                       | Low                                             | Low                                      | Low                                  | Unclear      |
| Kuchay et al.    | 2020 | Low                                         | Low                                     | Unclear                                                   | Low                                             | Low                                      | Low                                  | Unclear      |
| Newsome et al.   | 2020 | Low                                         | Low                                     | Low                                                       | Low                                             | Low                                      | Low                                  | Low          |

\* Note: for each of the seven domains of the Cochrane Collaboration's tool the presence of low risk of bias was highlighted in green; unclear risk was highlighted in yellow, and high risk of bias was highlighted in red. Only two RCTs had paired liver biopsy data (i.e., the reference method for assessing drug-induced changes in hepatic steatosis, necro-inflammation or fibrosis), so we arbitrarily assigned an unclear risk of bias in the "Other Bias" domain of the Cochrane Collaboration's tool when RCTs used MRI-PDFF or MRS, or a high risk of bias when RCTs used liver ultrasound.
